# Supplementary material
Source: PubMed Central journal article supplement (PMC2889106)
Supplement: 0910430107_pnas.200910430SI.pdf [file 0910430107_pnas.200910430SI.pdf]

# Supporting Information

Lin et al. 10.1073/pnas.0910430107

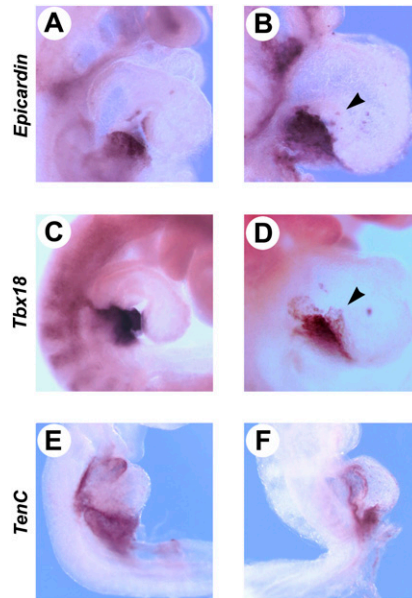

**Fig. S1.** Proepicardial markers are expressed in *Raldh2*<sup>-/-</sup> embryos. Whole-mount in situ hybridization was performed with *Epicardin* (A and B), *Tbx18* (C and D), and *TenC* (E and F). All genes are expressed to similar extents in *Raldh2*<sup>-/-</sup> embryos (B, D, and F) when compared with WT (A, C, and E), despite the heart looping defect. Arrowheads point to proepicardial cells colonizing the heart tube.

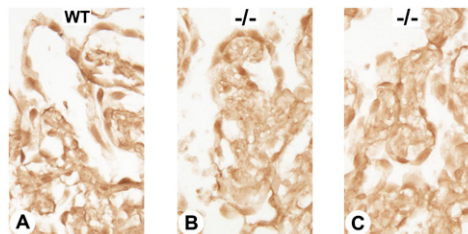

**Fig. S2.** Immunohistochemistry analysis of  $\beta$ -catenin in E12.5 WT (A) and *Raldh2*<sup>-/-</sup> hearts (B and C) after short-term RA rescue that show similar patterns of nuclear localization among cells of the trabecular myocardium.

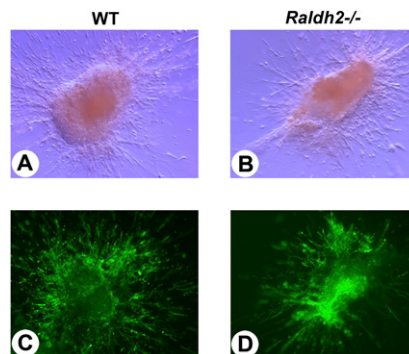

**Fig. S3.** Epicardial cells from *Raldh2*<sup>-/-</sup> mutants behave normally in epicardial invasion assays. Epicardial/subepicardial explants from E12.5 WT (A and C) and short-term rescued *Raldh2*<sup>-/-</sup> mutants (B and D) were cultured for 60 h on collagen gels (*Materials and Methods*). Epithelial-mesenchymal transformation was assessed as the invasion of cells into the gel (A and B) and the formation of vessel-like structures by immunostaining for smooth muscle  $\alpha$ -actin (C and D).

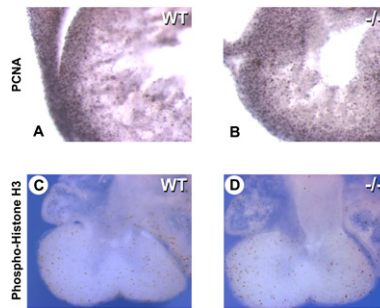

**Fig. S4.** Proliferating cell nuclear antigen (PCNA) (A and B) and phospho-histone H3 (C and D) immunohistochemistry analysis on E12.5 vibratome sections and E11.5 whole hearts, respectively. *Raldh2*<sup>-/-</sup> mutants (B and D) were obtained after short-term rescue (E7.5–8.5).

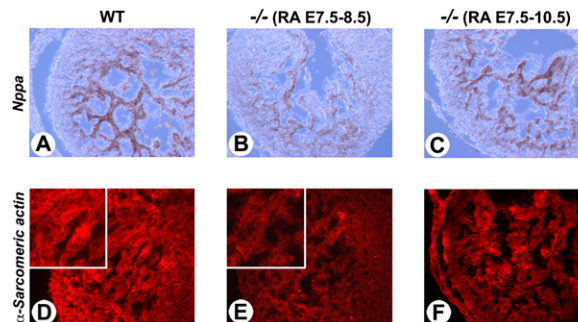

**Fig. S5.** RA deficiency impairs early differentiation of embryonic cardiomyocytes. (A–C) In situ hybridization shows decreased *Nppa* expression throughout the myocardium of short-term rescued mutants (B), whereas levels are almost normalized after longer-term rescue (E7.5–10.5) of the mutants (C). A similar observation was made by immunofluorescence analysis of  $\alpha$ -sarcomeric actin (D–F).

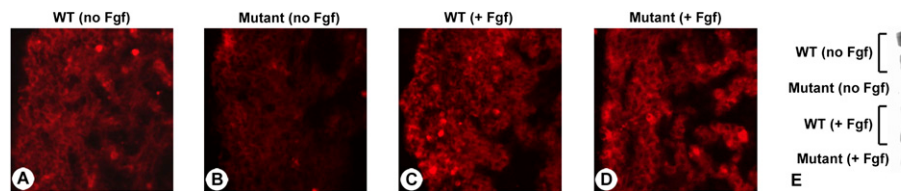

**Fig. S6.** Exogenous Fgf improves cardiomyocytic differentiation in *Raldh2*<sup>-/-</sup> heart explants. Hearts were collected from E12.5 WT and *Raldh2*<sup>-/-</sup> embryos, cultured for 28 h in Transwell inserts in the absence (A and B) or the presence of exogenous Fgf2 (200  $\mu$ g/mL), and analyzed by immunohistochemistry (A–D) or Western blot (E) for  $\alpha$ -sarcomeric actin. Both assays show increased  $\alpha$ -sarcomeric actin levels following Fgf2 administration.

**Table S1. Sources and concentrations of antibodies used for immunoreactions**

| Assay                | Antibodies                                                                                                                                                                                                                                                                                                                                                                                                                                                                                                                                                                                                                                                                                 |
|----------------------|--------------------------------------------------------------------------------------------------------------------------------------------------------------------------------------------------------------------------------------------------------------------------------------------------------------------------------------------------------------------------------------------------------------------------------------------------------------------------------------------------------------------------------------------------------------------------------------------------------------------------------------------------------------------------------------------|
| Western blot         | Anti-Fgf2 (1:200)<br>Anti-AKT (1:200)<br>Anti-phosphorylated AKT (1:1,000)<br>Anti ERK1/2 (1:200)<br>Anti-phosphorylated ERK1/2 (1:500) from Cell Signaling Technology<br>Anti- $\beta$ -catenin monoclonal antibody (1:100) from BIOMOL International, BA1902                                                                                                                                                                                                                                                                                                                                                                                                                             |
| Immunohistochemistry | Anti-Fgf2 (1:200 Cell Signaling)<br>Phospho-Akt (1:100 Cell Signaling)<br>$\beta$ -Catenin (1:200 Cell Signaling)<br>Sarcomeric myosin (MF-20, 1:100 DSHB, University of Iowa)<br>Cardiac troponin-T (CT-3, 1:100 DSHB, University of Iowa)<br>Cardiac $\alpha$ -sarcomeric actin (1:200 Sigma; A2172)<br>Smooth muscle $\alpha$ -actin (1:500 Sigma; A2547 clone 1A4),<br>Goat anti-mouse Ki67 (1:200 BD Sciences #556006)<br>Goat anti-mouse phospho-histone H3 (1:200 Cell Signaling)<br>Rabbit anti-mouse c-Kit (1:400 Santa Cruz Biotechnology SC-5535)<br>Alexa 488-, Alexa 594-, and Cy5-coupled secondary antibodies<br>(Molecular Probes and Jackson ImmunoResearch Laboratories) |

**Table S2. Primer sequences for real-time quantitative PCR**

| Gene          | Forward primer (5' → 3')    | Reverse primer (5' → 3')  |
|---------------|-----------------------------|---------------------------|
| <i>Fgf2</i>   | GCGACCCACACGTCAAACCTA       | TCCATCTTCCTCATAGCAAGGT    |
| <i>Fgf9</i>   | ATGGCTCCCTTAGGTGAAGTT       | TCATTTAGCAACACCGGACTG     |
| <i>Gli1</i>   | TGTGTGAGCAAGAAGGTTGC        | GACCATGCACTGTCTTCACG      |
| <i>Gli3</i>   | CTTTGCAAGCCAGGAGAAAC        | CCCACCCGAGCTATAGTTGT      |
| <i>Shh</i>    | AAAGCTGACCCTTTAGCCTA        | TTCGGAGTTTCTTGTGATCTCC    |
| <i>Ptc1</i>   | CTCAGGCAATACGAAGCACA        | GACAAGGAGCCAGAGTCCAG      |
| <i>Wnt9b</i>  | CTGGTGCTCACCTGAAGCAG        | CCGTCTCCTTAAAGCCTCTCTG    |
| <i>Gapdh</i>  | TGCACCACCAACTGCTTAGC        | GGCATGGACTGTGGTCATGAG     |
| <i>Sca-1</i>  | TGGATTCTCAAACAAGGAAAGTAAAGA | ACCCAGGATCTCCATACTTTCAATA |
| <i>Nkx2.5</i> | GACAAAGCCGAGACGGATGG        | CTGTGCTTGCCTTGTAGC        |
| <i>Gata4</i>  | TCTCACTATGGGCACAGCAG        | ACAGCACTGGATGGATGGAG      |
| <i>Mef2C</i>  | GTCAGTTGGGAGCTTGCCTA        | CGGTCTTAGGAGGAGAAACA      |
| <i>c-Kit</i>  | TCATCGAGTGTGATGGGAAA        | GGTGACTTGTTCAGGCAACA      |
| <i>Isl1</i>   | CACTATTTGCCACCTAGCCAC       | AAATACTGATTACACTCCGCAC    |
| <i>Nppa</i>   | ACCCCTCCGATAGATCTGC         | TTCGGTACCGGAAGCTGT        |
